1 **Title:** Concordance of high blood pressure among middle-aged and older same-sex couples in  
2 the USA

3 **Author Names:** Jithin Sam Varghese<sup>1,2</sup>, Michael G. Curtis<sup>2</sup>, Samuel C.O. Opara<sup>3</sup>, Shivani A.  
4 Patel<sup>1,2</sup>, Anandi N. Sheth<sup>3</sup>, Sophia A. Hussen<sup>2,3</sup>

5 **Author Affiliations:**

6 1 Emory Global Diabetes Research Center of Woodruff Health Sciences Center, Emory  
7 University, Atlanta, GA, USA

8 2 Hubert Department of Global Health, Rollins School of Public Health, Emory University,  
9 Atlanta, GA, USA

10 3 Department of Medicine, School of Medicine, Emory University, Atlanta, GA, USA

11 **Corresponding Author:** Jithin Sam Varghese, Emory Global Diabetes Research Center of  
12 Woodruff Health Sciences Center, Emory University, Atlanta, GA, USA

13 **Short running head:** Couple concordance in same-sex couples

14 **Abbreviations:** ACC/AHA: American College of Cardiology/American Heart Association, ISR:  
15 Institute for Social Research, MSM: Men who have sex with men, WSW: Women who have sex  
16 with women

17 **Word count:** 793

18 **Tables/figures:** 1

19 **References:** 5

20

21 **Abstract**

22 Heterosexual couples in romantic relationships are known to influence each other's hypertension  
23 risk. However, the role of partners on an individual's hypertension status in same-sex  
24 relationships is less understood. Our objective is to characterize the burden of high blood  
25 pressure among middle-aged and older couples consisting of men who have sex with men  
26 (MSM) and women who have sex with women (WSW) living in the US. Among 81 same-sex  
27 couples from the Health and Retirement Study 2006-18, 72.4% (95%CI: 23.4-95.7) MSM  
28 couples and 61.0% (95%CI: 30.4-84.8) WSW couples consisted of both partners with  
29 hypertension. Same-sex couples demonstrate high concordance of hypertension and related risk  
30 factors, suggesting a need to develop novel interventions targeting MSM and WSW couples

## 31 **Introduction**

32 Hypertension affects 115 million adults in the United States (US).<sup>1</sup> Heterosexual couples in  
33 romantic relationships are known to influence each other's hypertension risk (including  
34 overweight/obesity) and hypertension status, suggesting couple-focused interventions may be  
35 beneficial for long-term disease management.<sup>2</sup> However, the role of partners on an individual's  
36 hypertension status in same-sex relationships is less understood, despite substantial health  
37 disparities for sexual minorities relative to the general population.<sup>3,4</sup> Our objective is to  
38 characterize the burden of overweight/obesity and high blood pressure among middle-aged and  
39 older couples consisting of men who have sex with men (MSM) and women who have sex with  
40 women (WSW) living in the US.

## 41 **Methods**

42 We used data from the Health and Retirement Study (2006-2018), which contains nationally  
43 representative, longitudinal household surveys of individuals aged 50 years and older, and their  
44 partners. Couples were defined as same-sex individuals who self-reported being in a romantic  
45 relationship with each other. Gender and sexual orientation were not independently ascertained.  
46 The analytic sample consisted of 39 MSM and 42 WSW couples, among whom both partners  
47 had measured blood pressure.

48 We conducted a pooled analysis of seven study waves of the HRS, given the limitations in  
49 sample size, separately for MSM and WSW couples. We used the latest available data on  
50 hypertension for each primary respondent and their partner. Blood pressure was measured thrice  
51 for each respondent using validated electronic monitors, and the average of the last two  
52 measurements were used to estimate systolic and diastolic blood pressure. Participants were  
53 considered as having high blood pressure if they met one of the following criteria: history of self-

54 reported high blood pressure (or hypertension) based on a provider diagnosis, systolic blood  
55 pressure  $\geq 130$  mmHg or diastolic blood pressure  $\geq 80$  mmHg.<sup>1</sup> Overweight or obesity was  
56 defined as body mass index  $\geq 25.0$  kg/m<sup>2</sup>, derived from height and weight measured by trained  
57 enumerators using standardized instruments. All analysis considered the complex survey design  
58 and applied sample weights provided. We compared these estimates with those from  
59 heterosexual couples surveyed as part of the Health and Retirement Study in 2016.<sup>2</sup>

## 60 **Results**

61 Among same-sex couples drawn from nationally representative surveys of adults 50 years or  
62 older in the US, 79.4% (31 out of 39) and 71.4% (30 out of 42) were measured in 2016 or later  
63 for couples comprising men who have sex with men (MSM) and women who have sex with  
64 women (WSW), respectively. Only 1.3% (95%CI: 0.4-3.9) of MSM but 53.1% (95%CI: 23.3-  
65 80.9) of WSW were married. At least one partner was 65 years or older among 64.5% (95%CI:  
66 21.3-92.4) MSM couples and 32.7% (95%CI: 11.8-63.7) WSW couples. The majority of couples  
67 consisted of non-Hispanic White partners among both MSM (80.8% [95%CI: 42.8-96.0]) and  
68 WSW (92.6% [95%CI: 68.5-98.6]).

69 Both partners had overweight or obesity in 64.2% (95%CI: 21.2-92.3) MSM couples and 35.6%  
70 (95%CI: 13.8-65.6) WSW couples. Similarly, 72.4% (95%CI: 23.4-95.7) MSM couples and  
71 61.0% (95%CI: 30.4-84.8) WSW couples consisted of both partners with hypertension (**Figure**).  
72 The burden of concordant hypertension is likely similar or higher than heterosexual couples  
73 (54.3% [95%CI: 52.2-56.3]) surveyed in 2016, although estimates for same-sex couples have  
74 low precision (**Figure**).

## 75 **Discussion**

76 Using nationally representative data from 2006 to 2018, this exploratory study demonstrated a  
77 high burden of concordant hypertension among middle-aged and older same-sex couples living  
78 in the US. Concordance rates may be similar or higher in same-sex than in heterosexual couples.<sup>2</sup>  
79 The majority of MSM and WSW couples also demonstrated concordance in overweight or  
80 obesity. These results suggest that couple-centered strategies designed for hypertension and  
81 related cardiovascular risk management in heterosexual couples may be particularly beneficial  
82 for same-sex couples.

83 Limitations of this study include pooling data over 12 years due to paucity of data. We did not  
84 explore if concordance was beyond what is statistically expected by chance and were unable to  
85 examine racial-ethnic differences due to underrepresentation of racial/ethnic minority groups.  
86 Additionally, although the estimates of same-sex marriage rates in this study (56.3%) were  
87 similar to what is observed nationally for all WSW couples (58.6%), the rates of marriage for  
88 MSM couples are much lower in this study (1.6% versus 57.3% nationally).<sup>5</sup> This requires  
89 further exploration and suggests possible non-representativeness of MSM couples included.  
90 Finally, although the 2017 ACC/AHA guidelines recommend diagnosis of hypertension based on  
91  $\geq 2$  readings taken on  $\geq 2$  visits, only blood pressure measurements from the latest survey were  
92 included.<sup>1</sup>

93 In summary, same-sex couples demonstrate high concordance of hypertension and related risk  
94 factors, suggesting a need to develop novel interventions targeting MSM and WSW couples. The  
95 small sample size of this exploratory study also highlights the need to study couple concordance  
96 further in sexual minority couples. Future studies of partner influences on health among same-

- 97 sex couples should be conducted, especially among racial-ethnic minorities who have
- 98 disproportionately high burden of hypertension.

## **ACKNOWLEDGEMENT/SUPPORT**

**Ethics approval and consent to participate:** All participants gave written informed consent before participation. We were exempted from ethical approval for this secondary data analysis from the Institutional Review Board of Emory University.

**Data Availability Statement:** All datasets used in this analysis are available for download at <https://hrs.isr.umich.edu>. The code for the analysis is available on [https://github.com/jvargh7/msm\\_hiv\\_htn/tree/main/hrs](https://github.com/jvargh7/msm_hiv_htn/tree/main/hrs).

**Consent for publication:** Not applicable

**Competing interests:** None declared

**Funding:** Emory Global Diabetes Research Center. Michael G. Curtis was supported by National Institute of Allergy and Infectious Diseases (T32AI157855) and Emory Center for AIDS Research (P30AI050409). Shivani A. Patel was supported by National Heart, Lung and Blood Institute (P01HL154996-01A1).

**Author contributions:** JSV and SH developed the study and the analysis plan with inputs from all authors. JSV had full access to the data in the study and takes responsibility for the integrity of the data and the accuracy of the data analysis. JSV wrote the first draft with inputs from SH. All authors edited and approved the manuscript.

**Acknowledgements:** We thank the participants and survey enumerators of Health and Retirement Study 2006-2018.

## References

1. Jaeger BC, Chen L, Foti K, et al. Hypertension Statistics for US Adults: An Open-Source Web Application for Analysis and Visualization of National Health and Nutrition Examination Survey Data. *Hypertension*. 2023;80(6):1311-1320. doi:10.1161/HYPERTENSIONAHA.123.20900
2. Varghese JS, Lu P, Choi D, et al. Spousal Concordance of Hypertension Among Middle-Aged and Older Heterosexual Couples Around the World: Evidence From Studies of Aging in the United States, England, China, and India. *JAHA*. Published online December 6, 2023:e030765. doi:10.1161/JAHA.123.030765
3. Spiker R. Same-Sex, Same Health? Health Concordance Among Same-Sex and Different-Sex Couples. *Popul Res Policy Rev*. 2021;40(6):1313-1340. doi:10.1007/s11113-021-09654-7
4. Gonzales G, Przedworski J, Henning-Smith C. Comparison of Health and Health Risk Factors Between Lesbian, Gay, and Bisexual Adults and Heterosexual Adults in the United States: Results From the National Health Interview Survey. *JAMA Intern Med*. 2016;176(9):1344. doi:10.1001/jamainternmed.2016.3432
5. Laquitta Walker, Danielle Taylor. *Same-Sex Couple Households: 2019*. US Census Bureau; 2021. Accessed December 15, 2023. <https://www.census.gov/library/publications/2021/acs/acsbr-005.html>



**Figure. Concordance of high blood pressure among heterosexual and same-sex couples in Health and Retirement Study**

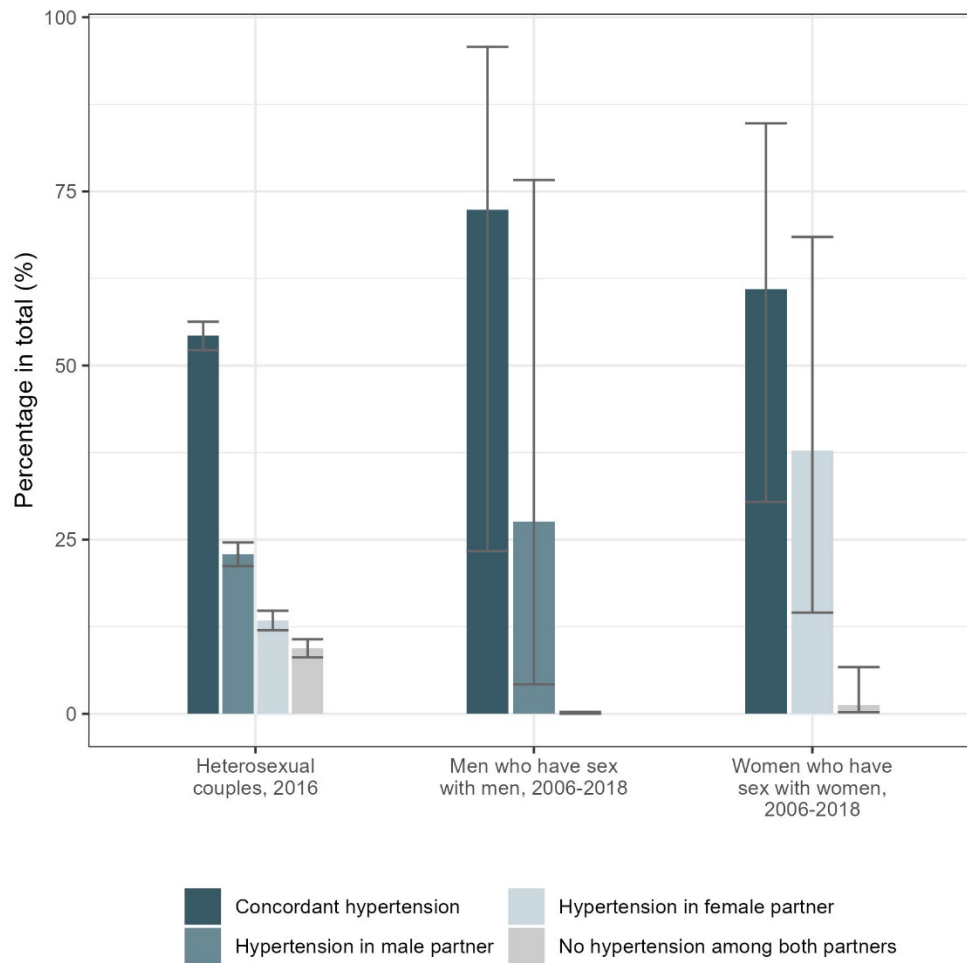

All estimates are survey weighted proportions and 95% confidence intervals. We first normalized sample weights for an observation by dividing it by the sum of sample weights for the wave. Next, we inverse-weighted the normalized sample weight with proportion of participants in the pooled serial cross-sectional dataset corresponding to that wave to account for wave-specific sample sizes. Mean (SD) age for heterosexual wives and husbands were 62.9 (9.7) years and 65.7 (9.7) years respectively. Mean (SD) age for the younger and older partner in MSM couples ( $n = 39$ ) were 53.9 (10.1) years and 61.4 (5.4) years. Mean (SD) age for the younger and older partners in WSW couples ( $n = 42$ ) were 54.5 (5.2) years and 61.4 (5.9) years.
